# Supplementary material for: Structural diversity in coordination polymers with a semirigid Lewis acidity ligand: structures and properties
Source: Royal Society of Chemistry journal article supplement (doi:10.1039/c5ce00677e), 2015-01-01
Supplement: c5ce00677e1.pdf [file c5ce00677e1.pdf]

# **Structural diversity in coordination polymers with semirigid Lewis acidity ligand: structures and properties**

Yong-Qing Huang,<sup>\*a</sup> Hai-Di Cheng,<sup>a</sup> Huai-Ying Chen,<sup>a</sup> Yi Wan,<sup>a</sup> Cheng-Long Liu,<sup>a</sup> Yue Zhao,<sup>\*b</sup>  
Xin-Feng Xiao<sup>a</sup> and Li-Hui Chen<sup>a</sup>

<sup>a</sup>State Key Laboratory of Mining Disaster Prevention and Control Co-founded by Shandong Province and the Ministry of Science and Technology, Shandong University of Science and Technology, Qingdao 266590, China

<sup>b</sup>State Key Laboratory of Coordination Chemistry, School of Chemistry and Chemical engineering, Nanjing National Laboratory of Microstructures, Nanjing University, Nanjing 210093, China

**Corresponding Author:**

**Dr. Yong-Qing Huang**

**Email: yqhuangskd@163.com**

**Table S1** Distances(Å) and angles (°) of hydrogen bondings for **2** and **4**<sup>a</sup>

| D-H...A                | Distance |                      | Angle   |
|------------------------|----------|----------------------|---------|
|                        | (D...A)  | D-H-A                | (D-H-A) |
| <b>2</b>               |          |                      |         |
| O(1W)-H(1WA)...O(7)#1  | 3.183(7) | O(1W)-H(1WA)-O(7)#1  | 156(8)  |
| O(1W)-H(1WB)...O(1W)#2 | 3.076(6) | O(1W)-H(1WB)-O(1W)#2 | 142(8)  |
| <b>4</b>               |          |                      |         |
| O(1W)-H(1WA)...O(7)#3  | 2.23(12) | O(1W)-H(1WA)-O(7)#3  | 139(16) |
| O(1W)-H(1WB)...O(2)#4  | 1.98(7)  | O(1W)-H(1WB)-O(2)#4  | 160(18) |

<sup>a</sup> Symmetry transformations used to generate equivalent atoms: #1  $x-1/2, -y+5/2, z+1/2$ ; #2  $-x+3/2, y+1/2, -z+3/2$ ; #3  $-x, -y+2, -z+1$ ; #4  $-x+1/2, -y+3/2, -z+1$ .

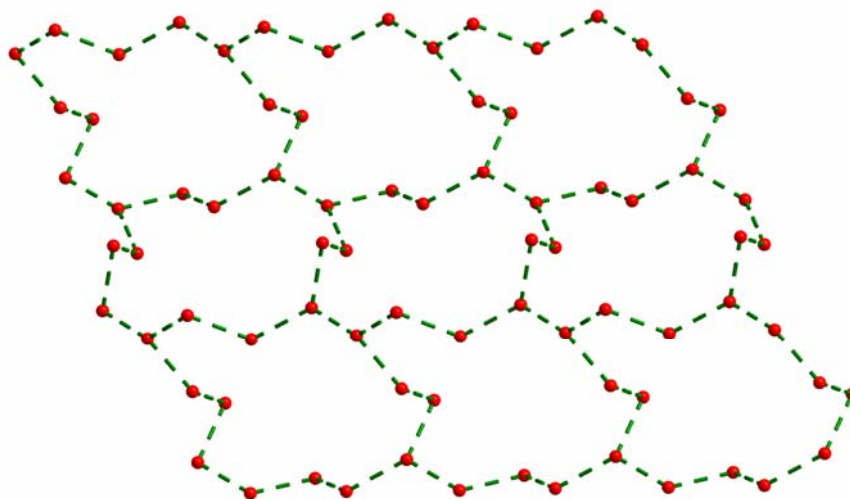**Fig. S1** View of 2D layered water cluster in complex **1**.

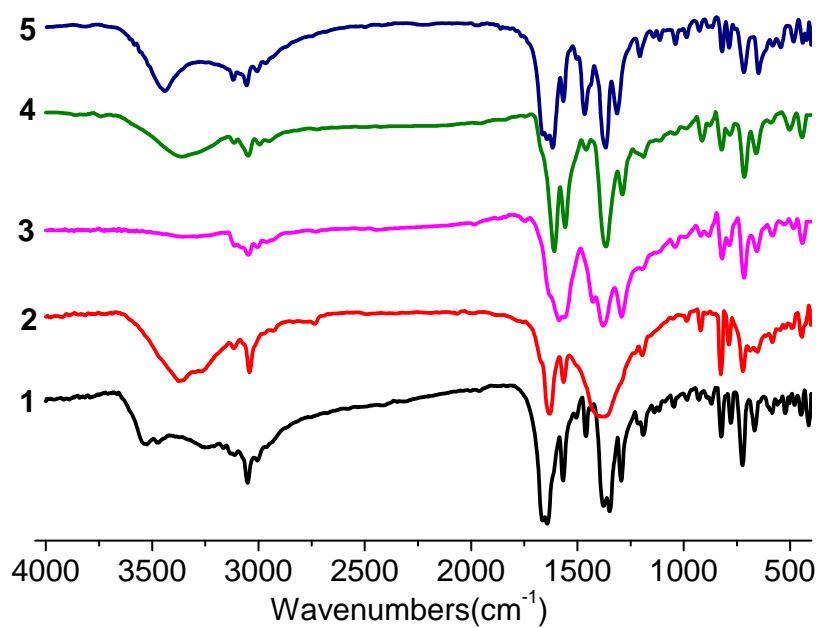

**Fig. S2** The IR spectra of complexes 1-5.

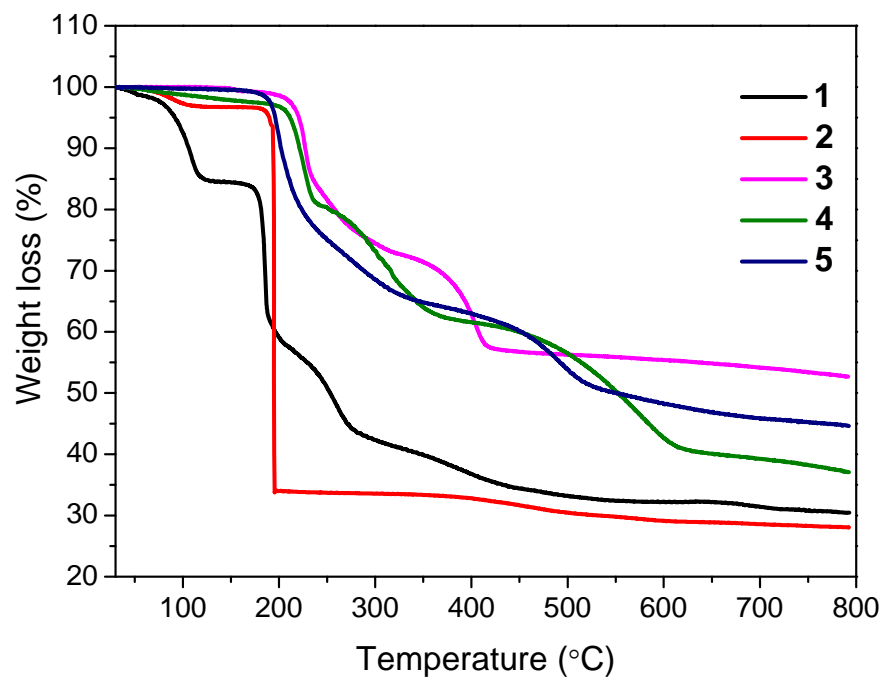

**Fig. S3** TGA plots of complexes 1-5.

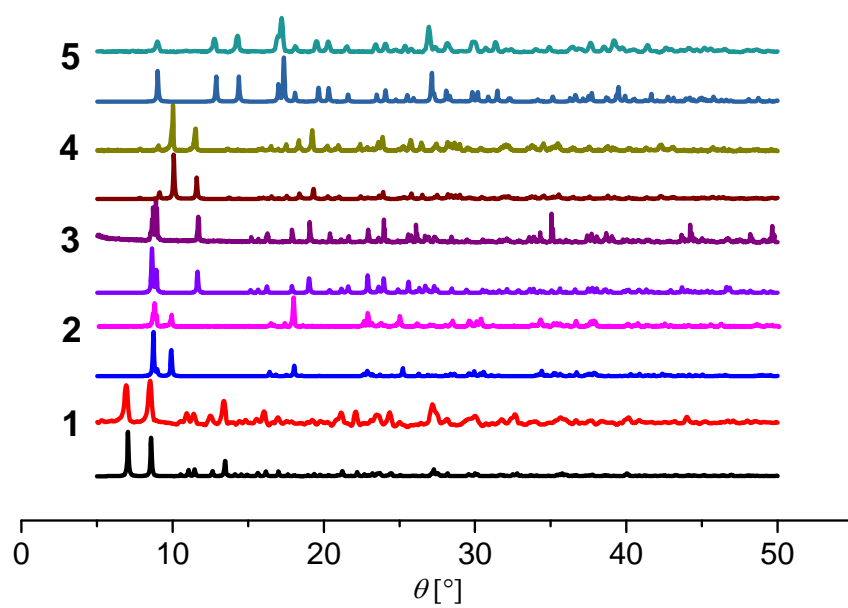

**Fig. S4** Powder X-ray diffraction (PXRD) pattern of complexes **1–5**. Down: calculated from single crystal data; Top: experimental.
